# Supplementary material
Source: PubMed Central journal article supplement (PMC6784495)
Supplement: Supp_Fig1.pdf [file Supp_Fig1.pdf]

## Supplementary Data

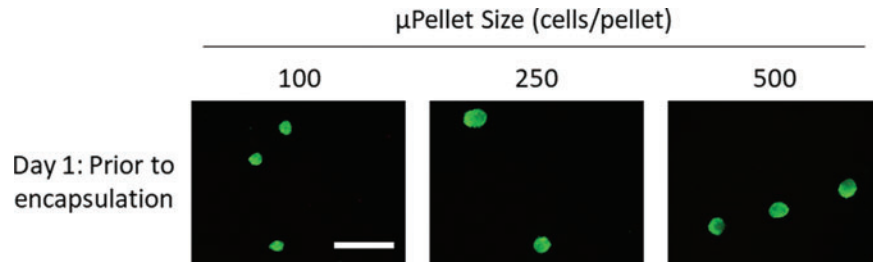

**SUPPLEMENTARY FIG. S1.** Viability of free floating  $\mu$ Pellets 24 h after formation in AggreWell. *Green*: live cells, *Red*: dead cells (Note: no dead cells visualized), scale bar = 500  $\mu$ m.  $\mu$ Pellet, micropellet.
