# Supplementary material
Source: PubMed Central journal article supplement (PMC6784495)
Supplement: Supp_Fig2.pdf [file Supp_Fig2.pdf]

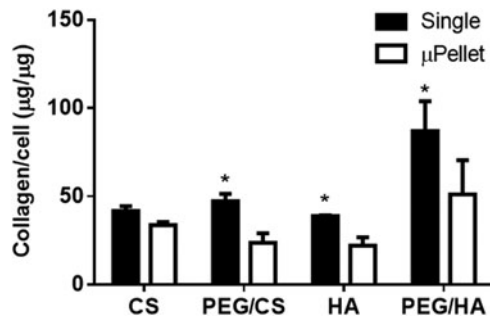

**SUPPLEMENTARY FIG. S2.** Single cell encapsulation led to higher collagen production per cell than  $\mu$ Pellet encapsulation. Total collagen at day 21 was normalized to day 21 DNA content for all groups. \*Denotes statistical significance between single and  $\mu$ Pellet groups in the same hydrogel composition,  $p < 0.05$ ,  $n = 5$ .
