# Supplementary material
Source: PubMed Central journal article supplement (PMC6784495)
Supplement: Supp_Fig3.pdf [file Supp_Fig3.pdf]

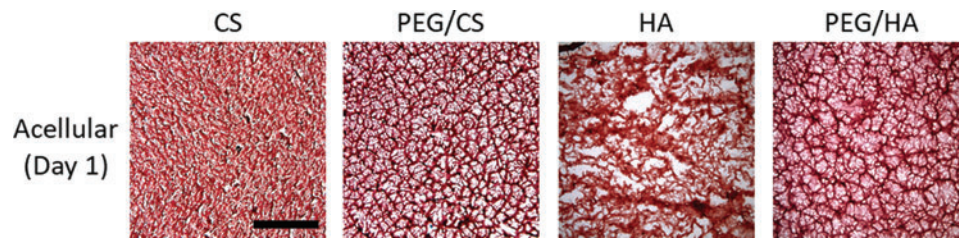

**SUPPLEMENTARY FIG. S3.** Background staining of acellular sGAG containing hydrogels using Safranin O staining at day 1. *Red*: sGAG, scale bar = 500  $\mu$ m.
