# Supplementary material
Source: PubMed Central journal article supplement (PMC6784495)
Supplement: Supp_Table1.pdf [file Supp_Table1.pdf]

SUPPLEMENTARY TABLE S1. HYDROGEL COMPOSITIONS

| <i>Group</i> | <i>Polymer</i>   |                  |                  |
|--------------|------------------|------------------|------------------|
|              | <i>PEGDA (%)</i> | <i>CS-MA (%)</i> | <i>HA-MA (%)</i> |
| (1) PEG/CS   | 2.75             | 1.65             |                  |
| (2) CS       |                  | 4                |                  |
| (3) PEG/HA   | 2.75             |                  | 1.25             |
| (4) HA       |                  |                  | 3                |

Wet weight percentage of each polymer component.

CS, chondroitin sulfate; CS-MA, chondroitin sulfate-methacrylate; HA, hyaluronic acid; HA-MA, hyaluronic acid-methacrylate; PEG, polyethylene glycol; PEGDA, poly(ethylene glycol) diacrylate.
